# Supplementary material for: Electrostatics and depletion determine competition between 2D nematic and 3D bundled phases of rod-like DNA nanotubes
Source: Royal Society of Chemistry journal article supplement (doi:10.1039/c6sm00222f), 2016-01-01
Supplement: c6sm00222f1.pdf [file c6sm00222f1.pdf]

# Supplement to: Electrostatics and depletion determine competition between 2D nematic and 3D bundled phases of rod-like DNA nanotubes

Chang-Young Park, Deborah K. Fygenson, and Omar A. Saleh

March 12, 2016

## S1 DNA sequences

NTs are assembled from six oligos, with lengths and sequences given in Table S1. These six oligos are based on those used by Bertrand *et al.* [1], which in turn was based on sequences developed by Rothmund *et al.* [2]. Note that the naming scheme in Bertrand differs from that used in Rothmund; we refer here to the names used in Bertrand. We use oligos SE1 through SE5 exactly as in Bertrand. The sixth oligo is a truncation of the oligo termed SE6-2 in Bertrand, retaining bases five through thirty. The six oligos assemble into a tile. Tiles assemble into rod-like nanotubes at a density of 7 tiles every 14.5 nm. Given that each tile contains 174 nucleotides, with one charged phosphate per nucleotide, we arrive at a linear charge density of 84/nm, as utilized in the text.

## S2 Calculating the effective charge of rods

Our model relies on the calculation of an effective line charge density,  $\nu_{eff}$ , of the DNA NTs. This permits estimate of rod-rod and rod-plane electrostatic interactions using the formulas of Debye-Huckel solution electrostatics. The method is based on the work of Neukirch and Marko [3] and Stigter [4]. In particular,  $\nu_{eff}$  is found from Neukirch and Marko’s Eq. 1:

$$\nu_{eff} = \frac{\nu\lambda_D}{\gamma r K_1(r/\lambda_D)} \quad (S1)$$

where  $\nu$  is the actual (bare) line charge density of the rod,  $\lambda_D$  is the solution Debye length,  $r$  is the rod radius,  $K_1$  is the 1st modified Bessel function of the second kind, and  $\gamma$  is a numerical correction factor that varies with rod and solution parameters.

The value of  $\gamma$  is found from the numerical results of Stigter [4]. Stigter presents a table (his Table III) of values of  $\gamma$  calculated for a variety of values of the parameters  $x_0$  and  $y_0$ , where  $x_0 = r/\lambda_D$ ,  $y_0 = e\psi_0/k_B T$ ,  $\psi_0$  is the potential at the surface of the cylinder,  $e$  is the electronic charge, and  $k_B T$  is the thermal energy. This table is reproduced here as Table S2.

Knowledge of biomolecular structure and solution conditions gives  $r$ ,  $\nu$ , and  $\lambda_D$ , but these do not determine the value of  $y_0$ . To find  $\gamma$ , it is necessary to use a second correction parameter,  $\beta$ .  $\beta$  is a numerically-calculated parameter that interrelates  $x_0$  and  $y_0$  through the following equation (Stigter’s Eq. 16):

$$\beta y_0 = \frac{2l_B \nu}{x_0} \frac{K_0(x_0)}{K_1(x_0)}. \quad (S2)$$

Stigter presents a table of values of  $\beta$  for a range of values of  $x_0$  and  $y_0$  (his Table II). However, Eq. S2 shows that the product  $\beta y_0$  (and not  $\beta$  alone) can be directly calculated from the input parameters ( $r$ ,  $\nu$ ,  $\lambda_D$ ). Thus, a more practically useful table is that of  $\beta y_0$  as a function of  $x_0$  and  $y_0$ ; this is presented here as Table S3.

The procedure for finding the effective charge of the rod, given  $r, \nu$  and  $\lambda_D$ , is then as follows:

1. Calculate  $x_0 = r/\lambda_D$
2. Use Eq. S2 to calculate  $\beta y_0$
3. Using  $x_0$  and  $\beta y_0$ , interpolate in Table S3 to find  $y_0$
4. Using  $x_0$  and  $y_0$ , interpolate in Table S2 to find  $\gamma$
5. Using  $\gamma$ , calculate  $\nu_{eff}$  using Eq. S1

Here, we carry out interpolation using the Mathematica *Interpolation* function. For step 3, Table S3 is used to construct a first order interpolation function for  $y_0$  over the space  $(\log x_0, \beta y_0)$ . For step 4, Table S2 is used to construct a second order interpolation function for  $\gamma$  over the space  $(\log x_0, y_0)$ .

## References

- [1] O. J. N. Bertrand, D. K. Fygenon and O. A. Saleh, *Proceedings of the National Academy of Sciences of the United States of America*, 2012, **109**, 173427.
- [2] P. W. K. Rothmund, A. Ekani-Nkodo, N. Papadakis, A. Kumar, D. K. Fygenon and E. Winfree, *Journal of the American Chemical Society*, 2004, **126**, 1634452.
- [3] S. Neukirch and J. F. Marko, *Physical Review Letters*, 2011, **106**, 138104.
- [4] D. Stigter, *Journal of Colloid and Interface Science*, 1975, **53**, 296306.

Table S1: Sequences of oligos used to assemble the NTs

| <i>oligo name</i> | <i>length</i> | <i>sequence</i>                                         |
|-------------------|---------------|---------------------------------------------------------|
| SE1               | 37            | CTC AGT GGA CAG CCG TTC TGG AGC GTT GGA CGA AAC T       |
| SE2               | 26            | GTC TGG TAG AGC ACC ACT GAG AGG TA                      |
| SE3               | 42            | CCA GAA CGG CTG TGG CTA AAC AGT AAC CGA AGC ACC AAC GCT |
| SE4               | 26            | CAG ACA GTT TCG TGG TCA TCG TAC CT                      |
| SE5               | 17            | CGA TGA CCT GCT TCG GT                                  |
| SE6-25-30         | 26            | ATG CAC TAC TGT TTA GCC TGC TCT AC                      |

Table S2: Values of  $\gamma$  calculated by Stigter [4] for values of  $x_0$  ranging from 1/128 to  $\infty$ , and values of  $y_0$  ranging from 1 to 8

|           | $y_0$   |         |         |         |         |         |         |         |
|-----------|---------|---------|---------|---------|---------|---------|---------|---------|
|           | 1       | 2       | 3       | 4       | 5       | 6       | 7       | 8       |
| 1/128     | 1.00274 | 1.01105 | 1.02516 | 1.04543 | 1.07241 | 1.1068  | 1.14944 | 1.20122 |
| 1/64      | 1.00341 | 1.01374 | 1.03133 | 1.05671 | 1.09063 | 1.13401 | 1.18785 | 1.25298 |
| 1/32      | 1.0043  | 1.01735 | 1.03962 | 1.07185 | 1.11501 | 1.1702  | 1.23834 | 1.31989 |
| 1/16      | 1.00549 | 1.02218 | 1.0507  | 1.09198 | 1.14718 | 1.21729 | 1.30282 | 1.40337 |
| 1/8       | 1.00706 | 1.02852 | 1.06515 | 1.118   | 1.18812 | 1.27601 | 1.38127 | 1.50238 |
| 1/4       | 1.00904 | 1.03649 | 1.08311 | 1.14982 | 1.23711 | 1.34455 | 1.47052 | 1.61241 |
| $x_0$ 1/2 | 1.01137 | 1.04576 | 1.1037  | 1.18554 | 1.2908  | 1.41779 | 1.56374 | 1.72526 |
| 1         | 1.01383 | 1.05543 | 1.1248  | 1.22136 | 1.34338 | 1.488   | 1.65154 | 1.83017 |
| 2         | 1.01609 | 1.06244 | 1.14367 | 1.25274 | 1.38858 | 1.54738 | 1.72492 | 1.91709 |
| 4         | 1.01789 | 1.07112 | 1.15824 | 1.27661 | 1.42249 | 1.59145 | 1.77894 | 1.98073 |
| 8         | 1.01912 | 1.07581 | 1.16805 | 1.29251 | 1.44488 | 1.62036 | 1.81421 | 2.02215 |
| 16        | 1.01986 | 1.07865 | 1.17396 | 1.30203 | 1.45822 | 1.63751 | 1.83508 | 2.04664 |
| $\infty$  | 1.02075 | 1.08198 | 1.18083 | 1.31304 | 1.47356 | 1.65719 | 1.85898 | 2.07463 |

Table S3: Values of  $\beta y_0$ , based on Table II of Stigter [4], for values of  $x_0$  ranging from 1/128 to  $\infty$ , and values of  $y_0$  ranging from 1 to 8

|           | $y_0$   |         |         |         |         |         |         |         |
|-----------|---------|---------|---------|---------|---------|---------|---------|---------|
|           | 1       | 2       | 3       | 4       | 5       | 6       | 7       | 8       |
| 1/128     | 1.0014  | 2.0115  | 3.04062 | 4.10276 | 5.21925 | 6.4251  | 7.7805  | 9.392   |
| 1/64      | 1.00212 | 2.01752 | 3.06246 | 4.16044 | 5.34895 | 6.69228 | 8.3034  | 10.3824 |
| 1/32      | 1.00331 | 2.02756 | 3.09939 | 4.25904 | 5.57365 | 7.16034 | 9.22516 | 12.1271 |
| 1/16      | 1.00529 | 2.04428 | 3.16119 | 4.42528 | 5.9543  | 7.95366 | 10.779  | 15.0347 |
| 1/8       | 1.00845 | 2.071   | 3.2601  | 4.69116 | 6.5605  | 9.20478 | 13.194  | 19.4772 |
| 1/4       | 1.01309 | 2.11022 | 3.40467 | 5.07656 | 7.42785 | 10.9653 | 16.5303 | 25.5072 |
| $x_0$ 1/2 | 1.01908 | 2.16056 | 3.58848 | 5.55968 | 8.49595 | 13.0925 | 20.4908 | 32.5621 |
| 1         | 1.0256  | 2.21492 | 3.78417 | 6.06528 | 9.59315 | 15.2399 | 24.4319 | 39.5088 |
| 2         | 1.03147 | 2.2633  | 3.95592 | 6.5016  | 10.5249 | 17.0387 | 27.6994 | 45.2245 |
| 4         | 1.03586 | 2.29924 | 4.08186 | 6.81716 | 11.1906 | 18.3117 | 29.9953 | 49.2213 |
| 8         | 1.0387  | 2.32226 | 4.16178 | 7.0156  | 11.6057 | 19.1005 | 31.4117 | 51.6791 |
| 16        | 1.04034 | 2.33558 | 4.20768 | 7.12884 | 11.8415 | 19.5468 | 32.2109 | 53.0662 |
| Infinity  | 1.04219 | 2.3504  | 4.25856 | 7.25372 | 12.1004 | 20.0357 | 33.0852 | 54.5798 |
